# Supplementary material for: Structures and properties of newly synthesized semi-aromatic polyamide thermoplastic elastomers
Source: Royal Society of Chemistry journal article supplement (doi:10.1039/d2py00541g), 2022-01-01
Supplement: d2py00541g1.pdf [file d2py00541g1.pdf]

## Supporting information

### Structure and properties of a newly synthesized semi-aromatic polyamide thermoplastic elastomer

Xiao-bo Fu<sup>a</sup>, Tong Zhang<sup>a</sup>, Jia-cao Yang<sup>b,\*</sup>, Gang Zhang<sup>b</sup>, Mei-lin Zhang<sup>a</sup>, Xiao-jun Wang<sup>b</sup>, Jie Yang<sup>b,c\*</sup>

<sup>a</sup> College of Polymer Science and Engineering, Sichuan University, Chengdu, 610065, China

<sup>b</sup> Analytical and Testing Center, Sichuan University, Chengdu, 610064, China

<sup>c</sup> State Key Laboratory of Polymer Materials Engineering, Sichuan University, Chengdu, 610065, China

\* Correspondence author.

E-mail address: [yangjc@scu.edu.cn](mailto:yangjc@scu.edu.cn) (J.-C. Yang) or [ppsf@scu.edu.cn](mailto:ppsf@scu.edu.cn) (J. Yang).

**Table S1** Quantity of raw materials for synthesizing prepolymer samples used in this study

| Prepolymer      | TPA (mol) | IPA (mol) | DDA (mol) | H <sub>2</sub> O (g) |
|-----------------|-----------|-----------|-----------|----------------------|
| Pre-PA12T/12I-0 | 0-        | 0.176     | 0.126     | 12.8                 |
| Pre-PA12T/12I-1 | 0.0176    | 0.1584    | 0.126     | 12.8                 |
| Pre-PA12T/12I-2 | 0.0352    | 0.1408    | 0.126     | 12.8                 |
| Pre-PA12T/12I-3 | 0.0528    | 0.1232    | 0.126     | 12.8                 |
| Pre-PA12T/12I-4 | 0.0704    | 0.1056    | 0.126     | 12.8                 |
| Pre-PA12T/12I-5 | 0.0880    | 0.0880    | 0.126     | 12.8                 |
| Pre-PA12T/12I-6 | 0.1056    | 0.0704    | 0.126     | 12.8                 |

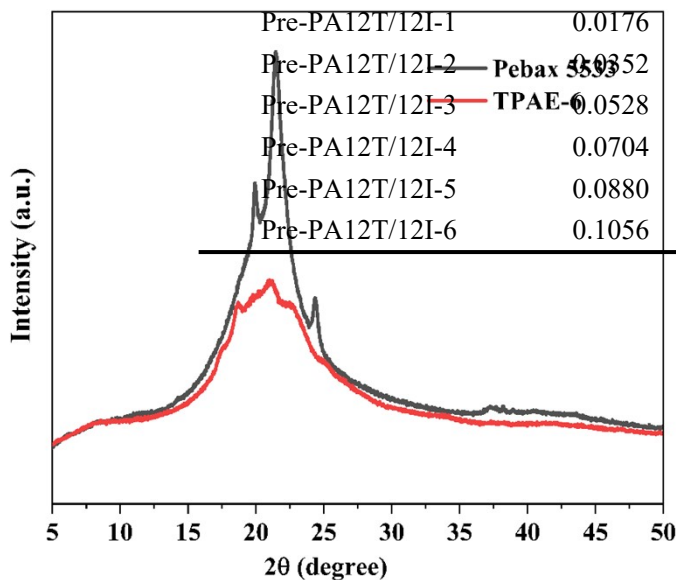

**Figure S1.** WAXD patterns of the TPAE-6 and Pebax 5533 at ambient temperatures

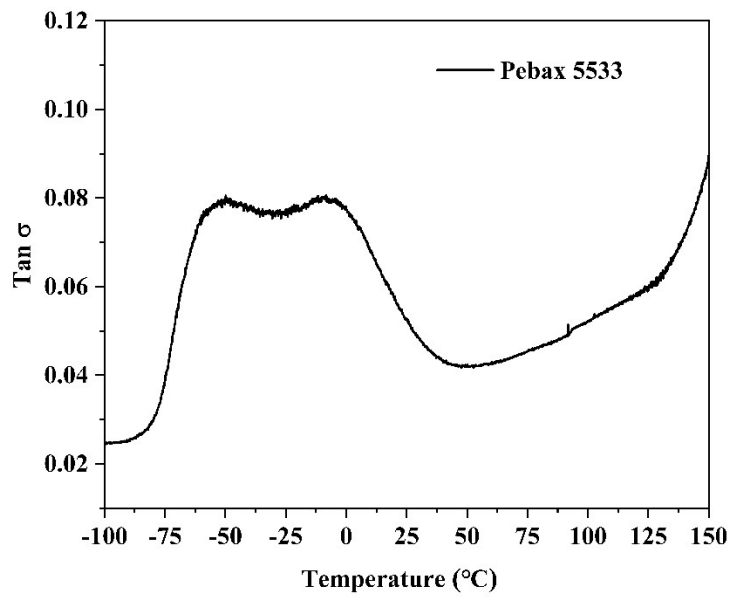

**Figure S2.** Loss factor ( $\tan \delta$ ) for Pebax 5533.
